# Supplementary material for: Broad-Spectrum In Vitro Activity of Nα-Aroyl-N-Aryl-Phenylalanine Amides against Non-Tuberculous Mycobacteria and Comparative Analysis of RNA Polymerases
Source: MDPI journal article supplement (doi:10.3390/antibiotics13050404), 2024-04-28
Supplement: s1 [file s1]

# Supplementary Information

Broad-Spectrum *In Vitro* Activity of  
 $N\alpha$ -aroyl-*N*-aryl-Phenylalanine Amides  
Against Non-Tuberculous Mycobacteria  
and Comparative Analysis of RNA  
Polymerases

---

**Table S 1.** MIC<sub>90</sub> values of a selection of AAPs against type strains of the *Mycobacterium abscessus* complex. Cell shading from green to red indicates high to low activity. The displayed values are average values of two technical replicates. For detailed information on the origin of clinical isolates see Materials & Methods section of the main manuscript.

|     | <i>M. abscessus</i><br>subsp. <b>abscessus</b><br>ATCC 19977 | <i>M. abscessus</i><br>subsp. <b>massiliense</b><br>CCUG 48898-T | <i>M. abscessus</i><br>subsp. <b>bolletii</b><br>CCUG 50184-T |
|-----|--------------------------------------------------------------|------------------------------------------------------------------|---------------------------------------------------------------|
| ID  | MIC <sub>90</sub> [μM]                                       | MIC <sub>90</sub> [μM]                                           | MIC <sub>90</sub> [μM]                                        |
| CLR | 1.5                                                          | 0.2                                                              | 0.5                                                           |
| MMV | 6.4                                                          | 9.1                                                              | 4.4                                                           |
| 1   | 7.3                                                          | 5.7                                                              | 1.9                                                           |
| 2   | 4.7                                                          | 4.8                                                              | 2.1                                                           |
| 3   | 2.1                                                          | 2.8                                                              | 8.5                                                           |
| 4   | 2.6                                                          | 4.4                                                              | 3.6                                                           |
| 5   | 1.5                                                          | 2.3                                                              | 2.3                                                           |
| 6   | 5.0                                                          | 4.0                                                              | 2.0                                                           |
| 7   | 1.8                                                          | 2.0                                                              | 2.1                                                           |
| 8   | 1.5                                                          | 1.4                                                              | 1.7                                                           |
| 9   | 4.8                                                          | 4.4                                                              | 6.5                                                           |
| 10  | 2.2                                                          | 2.6                                                              | 9.0                                                           |

**Table S 2.** MIC<sub>90</sub> values of a selection of AAPs against a panel of *Mycobacterium abscessus* complex clinical isolates. Cell shading from green to red indicates high to low activity. The displayed values are average values of two technical replicates. For detailed information on the origin of clinical isolates see Materials & Methods section of the main manuscript.

|     | <i>M. abscessus</i><br>subsp. <b>abscessus</b><br>Bamboo | <i>M. abscessus</i><br>subsp. <b>abscessus</b><br>M9 | <i>M. abscessus</i><br>subsp. <b>abscessus</b><br>M199 | <i>M. abscessus</i><br>subsp. <b>abscessus</b><br>M337 | <i>M. abscessus</i><br>subsp. <b>abscessus</b><br>M404 |
|-----|----------------------------------------------------------|------------------------------------------------------|--------------------------------------------------------|--------------------------------------------------------|--------------------------------------------------------|
| ID  | MIC <sub>90</sub> [μM]                                   | MIC <sub>90</sub> [μM]                               | MIC <sub>90</sub> [μM]                                 | MIC <sub>90</sub> [μM]                                 | MIC <sub>90</sub> [μM]                                 |
| CLR | 0.5                                                      | 6.7                                                  | 19.5                                                   | 7.3                                                    | 0.8                                                    |
| MMV | 8.2                                                      | 26.4                                                 | 29.3                                                   | 9.8                                                    | 14.2                                                   |
| 7   | 2.1                                                      | 8.1                                                  | 9.5                                                    | 3.5                                                    | 6.1                                                    |
| 8   | 2.3                                                      | 5.8                                                  | 9.3                                                    | 3.9                                                    | 7.0                                                    |

  

|     | <i>M. abscessus</i><br>subsp. <b>abscessus</b><br>M422 | <i>M. abscessus</i><br>subsp. <b>bolletii</b><br>M232 | <i>M. abscessus</i><br>subsp. <b>bolletii</b><br>M506 | <i>M. abscessus</i><br>subsp. <b>massiliense</b><br>M111 |
|-----|--------------------------------------------------------|-------------------------------------------------------|-------------------------------------------------------|----------------------------------------------------------|
| ID  | MIC <sub>90</sub> [μM]                                 | MIC <sub>90</sub> [μM]                                | MIC <sub>90</sub> [μM]                                | MIC <sub>90</sub> [μM]                                   |
| CLR | 4.2                                                    | 10.6                                                  | 1.1                                                   | 0.5                                                      |
| MMV | 13.4                                                   | 6.0                                                   | 10.8                                                  | 6.8                                                      |
| 7   | 1.8                                                    | 3.9                                                   | 2.9                                                   | 3.4                                                      |
| 8   | 1.8                                                    | 4.6                                                   | 2.9                                                   | 5.6                                                      |

**Table S 3.** MIC<sub>90</sub> values of a selection of AAPs against type strains of the *Mycobacterium avium* complex. Cell shading from green to red indicates high to low activity. The displayed values are average values of two technical replicates. For detailed information on the origin of clinical isolates see Materials & Methods section of the main manuscript.

|     | <i>M. avium</i><br>subsp. <i>hominissuis</i><br>MAC109 | <i>M. avium</i><br>subsp. <i>hominissuis</i><br>M. avium 11 | <i>M. intracellulare</i><br>subsp. <i>intracellulare</i><br>ATCC 13950 | <i>M. intracellulare</i><br>subsp. <i>chimaera</i><br>CCUG 50989 |
|-----|--------------------------------------------------------|-------------------------------------------------------------|------------------------------------------------------------------------|------------------------------------------------------------------|
| ID  | MIC <sub>90</sub> [μM]                                 | MIC <sub>90</sub> [μM]                                      | MIC <sub>90</sub> [μM]                                                 | MIC <sub>90</sub> [μM]                                           |
| CLR | 1.7                                                    | 0.4                                                         | 0.6                                                                    | 0.5                                                              |
| MMV | > 50 <sup>a</sup>                                      | 3.2                                                         | 3.2                                                                    | 2.0                                                              |
| 1   | 19.0                                                   | 1.7                                                         | 3.4                                                                    | 1.4                                                              |
| 2   | 14.1                                                   | 1.6                                                         | 1.9                                                                    | 1.3                                                              |
| 3   | 13.5                                                   | 1.4                                                         | 1.2                                                                    | 0.8                                                              |
| 4   | 14.4                                                   | 1.4                                                         | 1.0                                                                    | 0.7                                                              |
| 5   | 8.5                                                    | 1.2                                                         | 0.9                                                                    | 0.7                                                              |
| 6   | 9.6                                                    | 1.2                                                         | 1.4                                                                    | 0.7                                                              |
| 7   | 12.5                                                   | 1.0                                                         | 1.2                                                                    | 0.6                                                              |
| 8   | 6.3                                                    | 0.6                                                         | 0.5                                                                    | 0.3                                                              |
| 9   | 22.6                                                   | 1.5                                                         | 1.7                                                                    | 1.1                                                              |
| 10  | 9.6                                                    | 1.0                                                         | 1.1                                                                    | 0.6                                                              |

<sup>a</sup> incubation of *M. avium* subsp. *hominissuis* MAC109 with MMV did not reach 90% growth inhibition. MIC<sub>75</sub> = 6.6 μM.

**Table S 4.** MIC<sub>90</sub> values of a selection of AAPs against type strains of the different NTM. Cell shading from green to red indicates high to low activity. The displayed values are average values of two technical replicates. For detailed information on the origin of clinical isolates see Materials & Methods section of the main manuscript.

|     | <i>M. chelonae</i><br>ATCC 35752 | <i>M. fortuitum</i><br>ATCC 6841 | <i>M. szulgai</i><br>ATCC 35799 | <i>M. xenopi</i><br>ATCC 19250 | <i>M. ulcerans</i><br>S4018 | <i>M. marinum</i><br>ATCC 927 | <i>M. simiae</i> <sup>a</sup><br>ATCC 25275 | <i>M. malmoense</i> <sup>a</sup><br>ATCC 29571 | <i>M. kansasii</i><br>ATCC 12478 |
|-----|----------------------------------|----------------------------------|---------------------------------|--------------------------------|-----------------------------|-------------------------------|---------------------------------------------|------------------------------------------------|----------------------------------|
| ID  | MIC <sub>90</sub> [μM]           | MIC <sub>90</sub> [μM]           | MIC <sub>90</sub> [μM]          | MIC <sub>90</sub> [μM]         | MIC <sub>90</sub> [μM]      | MIC <sub>90</sub> [μM]        | MIC <sub>90</sub> [μM]                      | MIC <sub>90</sub> [μM]                         | MIC <sub>90</sub> [μM]           |
| CLR | 0.1                              | 2.9                              | 0.2                             | 0.1                            | 0.12                        | 9.1                           | > 100                                       | 3.4                                            | 0.4                              |
| MMV | 0.8                              | 1.5                              | 1.6                             | 48.8                           | 0.47                        | 2.2                           | > 100                                       | > 100                                          | 0.5                              |
| 1   | 0.4                              | 2.0                              | 2.8                             | 24.1                           | 0.16                        | 9.6                           | > 100                                       | > 100                                          | 2.6                              |
| 2   | 0.3                              | 0.9                              | 1.4                             | 21.2                           | 0.09                        | 3.2                           | 43.0                                        | > 100                                          | 0.6                              |
| 3   | 0.2                              | 1.5                              | 1.1                             | 6.9                            | 0.08                        | 2.7                           | 54.1                                        | 16.1                                           | 0.7                              |
| 4   | 0.4                              | 1.7                              | 1.8                             | 7.0                            | 0.13                        | 6.5                           | > 100                                       | 18.2                                           | 0.7                              |
| 5   | 0.4                              | 1.4                              | 0.9                             | 3.3                            | 0.10                        | 2.4                           | 45.7                                        | > 100                                          | 0.3                              |
| 6   | 0.5                              | 1.5                              | 9.0                             | 1.8                            | 0.05                        | 13.9                          | > 100                                       | > 100                                          | 2.8                              |
| 7   | 0.2                              | 0.8                              | 0.5                             | 8.0                            | 0.06                        | 1.2                           | > 100                                       | 2.3                                            | 0.2                              |
| 8   | 0.2                              | 0.6                              | 0.5                             | 3.3                            | 0.02                        | 1.4                           | 20.9                                        | 4.9                                            | 0.2                              |
| 9   | 0.5                              | 1.6                              | 1.2                             | 10.0                           | 0.14                        | 3.1                           | > 100                                       | > 100                                          | 0.8                              |
| 10  | 0.4                              | 1.0                              | 0.7                             | 5.2                            | 0.08                        | 1.9                           | 33.5                                        | 5.8                                            | 0.5                              |

<sup>a</sup> In some cases 90% growth inhibition was not reached for *M. simiae* ATCC 25275 and for *M. malmoense* ATCC 29571. MIC<sub>75</sub> values are displayed:

|     | <i>M.<br/>simiae</i><br>ATCC 25275 | <i>M.<br/>malmoense</i><br>ATCC 29571 |
|-----|------------------------------------|---------------------------------------|
| ID  | MIC <sub>75</sub> [μM]             | MIC <sub>75</sub> [μM]                |
| CLR | 29.3                               | 0.6                                   |
| MMV | 25.2                               | 3.1                                   |
| 1   | 36.9                               | 2.8                                   |
| 2   | 13.7                               | 1.7                                   |
| 3   | 16.4                               | 1.8                                   |
| 4   | 17.9                               | 2.2                                   |
| 5   | 11.0                               | 1.7                                   |
| 6   | 20.9                               | 5.5                                   |
| 7   | 6.3                                | 1.1                                   |
| 8   | 6.9                                | 0.6                                   |
| 9   | 20.5                               | 1.7                                   |
| 10  | 11.2                               | 1.3                                   |

**Table S 5.** Alignment of RpoB primary sequences of all tested strains from position 450-600. Position numbering refers to PDB: 5UHE. Dots represent amino acid identity.

[illegible]

**Table S 6.** Alignment of RpoC primary sequences of all tested strains from position 500-580. Position numbering refers to PDB: 5UHE. Dots represent amino acid identity.

| RpoC                                             |     |                           |                           |                          |                         |                      |                        |                         |                            |                           |                                                  |                                           |                                              |                                                        |                       |  |
|--------------------------------------------------|-----|---------------------------|---------------------------|--------------------------|-------------------------|----------------------|------------------------|-------------------------|----------------------------|---------------------------|--------------------------------------------------|-------------------------------------------|----------------------------------------------|--------------------------------------------------------|-----------------------|--|
| M. tuberculosis<br>ATCC 25618/H37Rv<br>PDB: 5UHE |     | M. chelonae<br>ATCC 35752 | M. fortuitum<br>ATCC 6841 | M. szulgai<br>ATCC 35799 | M. xenopi<br>ATCC 19250 | M. ulcerans<br>S4018 | M. marinum<br>ATCC 927 | M. simiae<br>ATCC 25275 | M. malmoense<br>ATCC 29571 | M. kansasii<br>ATCC 12478 | M. intracellulare<br>ssp. chimaera<br>CCUG 50989 | M. avium<br>ssp.<br>hominissuis<br>MAC109 | M. abscessus<br>ssp. abscessus<br>ATCC 19977 | M. intracellulare<br>ssp. intracellulare<br>ATCC 13950 | E. coli<br>ATCC 11775 |  |
| 1                                                | 800 | I                         | .                         | .                        | .                       | .                    | .                      | .                       | .                          | .                         | .                                                | .                                         | T                                            | .                                                      | Y                     |  |
| 2                                                | 801 | T                         | .                         | .                        | .                       | .                    | .                      | .                       | .                          | .                         | .                                                | .                                         | L                                            | .                                                      | M                     |  |
| 3                                                | 802 | I                         | .                         | .                        | .                       | .                    | .                      | .                       | .                          | .                         | .                                                | .                                         | L                                            | .                                                      | M                     |  |
| 4                                                | 803 | V                         | .                         | .                        | .                       | .                    | .                      | .                       | .                          | .                         | .                                                | .                                         | P                                            | .                                                      | A                     |  |
| 5                                                | 804 | D                         | E                         | K                        | .                       | E                    | .                      | .                       | .                          | .                         | .                                                | .                                         | K                                            | .                                                      | .                     |  |
| 6                                                | 805 | S                         | .                         | .                        | .                       | .                    | .                      | .                       | .                          | .                         | .                                                | .                                         | .                                            | .                                                      | .                     |  |
| 7                                                | 806 | G                         | .                         | .                        | .                       | .                    | .                      | .                       | .                          | .                         | .                                                | .                                         | .                                            | .                                                      | .                     |  |
| 8                                                | 807 | A                         | .                         | .                        | .                       | .                    | .                      | .                       | .                          | .                         | .                                                | .                                         | .                                            | .                                                      | .                     |  |
| 9                                                | 808 | T                         | .                         | .                        | .                       | .                    | .                      | .                       | .                          | .                         | .                                                | .                                         | .                                            | .                                                      | R                     |  |
| 10                                               | 809 | G                         | .                         | .                        | .                       | .                    | .                      | .                       | .                          | .                         | .                                                | .                                         | .                                            | .                                                      | .                     |  |
| 11                                               | 810 | N                         | .                         | .                        | .                       | .                    | .                      | .                       | .                          | .                         | .                                                | .                                         | .                                            | .                                                      | S                     |  |
| 12                                               | 811 | F                         | .                         | L                        | .                       | .                    | .                      | .                       | .                          | .                         | .                                                | .                                         | M                                            | .                                                      | A                     |  |
| 13                                               | 812 | T                         | .                         | .                        | .                       | .                    | .                      | .                       | .                          | .                         | .                                                | .                                         | .                                            | .                                                      | A                     |  |
| 14                                               | 813 | Q                         | .                         | .                        | .                       | .                    | .                      | .                       | .                          | .                         | .                                                | .                                         | .                                            | .                                                      | .                     |  |
| 15                                               | 814 | T                         | .                         | .                        | .                       | .                    | .                      | .                       | .                          | .                         | .                                                | .                                         | V                                            | .                                                      | I                     |  |
| 16                                               | 815 | R                         | .                         | .                        | .                       | .                    | .                      | .                       | .                          | .                         | .                                                | .                                         | .                                            | .                                                      | .                     |  |
| 17                                               | 816 | T                         | .                         | .                        | .                       | .                    | .                      | .                       | .                          | .                         | .                                                | .                                         | N                                            | .                                                      | Q                     |  |
| 18                                               | 817 | L                         | .                         | .                        | .                       | .                    | .                      | .                       | .                          | .                         | .                                                | .                                         | .                                            | .                                                      | .                     |  |
| 19                                               | 818 | A                         | .                         | .                        | .                       | .                    | .                      | .                       | .                          | .                         | .                                                | .                                         | .                                            | .                                                      | .                     |  |
| 20                                               | 819 | G                         | .                         | .                        | .                       | .                    | .                      | .                       | .                          | .                         | .                                                | .                                         | .                                            | .                                                      | .                     |  |
| 21                                               | 820 | M                         | .                         | .                        | .                       | .                    | .                      | .                       | .                          | .                         | .                                                | .                                         | .                                            | .                                                      | .                     |  |
| 22                                               | 821 | K                         | .                         | .                        | .                       | .                    | .                      | .                       | .                          | .                         | .                                                | .                                         | .                                            | .                                                      | R                     |  |
| 23                                               | 822 | G                         | .                         | .                        | .                       | .                    | .                      | .                       | .                          | .                         | .                                                | .                                         | .                                            | .                                                      | .                     |  |
| 24                                               | 823 | L                         | .                         | .                        | .                       | .                    | .                      | .                       | .                          | .                         | .                                                | .                                         | .                                            | .                                                      | .                     |  |
| 25                                               | 824 | V                         | .                         | .                        | .                       | .                    | .                      | .                       | .                          | .                         | .                                                | .                                         | .                                            | .                                                      | M                     |  |
| 26                                               | 825 | T                         | .                         | .                        | .                       | .                    | .                      | .                       | .                          | .                         | .                                                | .                                         | .                                            | .                                                      | A                     |  |
| 27                                               | 826 | N                         | .                         | .                        | .                       | .                    | .                      | .                       | .                          | .                         | .                                                | .                                         | .                                            | .                                                      | K                     |  |
| 28                                               | 827 | P                         | .                         | .                        | .                       | .                    | .                      | .                       | .                          | .                         | .                                                | .                                         | .                                            | .                                                      | .                     |  |
| 29                                               | 828 | K                         | .                         | .                        | .                       | .                    | .                      | .                       | .                          | .                         | .                                                | .                                         | .                                            | .                                                      | D                     |  |
| 30                                               | 829 | G                         | .                         | .                        | .                       | .                    | .                      | .                       | .                          | .                         | .                                                | .                                         | .                                            | .                                                      | .                     |  |
| 31                                               | 830 | E                         | .                         | .                        | .                       | .                    | .                      | .                       | .                          | .                         | .                                                | .                                         | .                                            | .                                                      | S                     |  |
| 32                                               | 831 | F                         | .                         | .                        | .                       | .                    | .                      | .                       | .                          | .                         | .                                                | .                                         | Y                                            | .                                                      | I                     |  |
| 33                                               | 832 | I                         | .                         | .                        | .                       | .                    | .                      | .                       | .                          | .                         | .                                                | .                                         | .                                            | .                                                      | .                     |  |
| 34                                               | 833 | P                         | .                         | .                        | .                       | .                    | .                      | .                       | .                          | .                         | .                                                | .                                         | .                                            | .                                                      | E                     |  |
| 35                                               | 834 | R                         | .                         | .                        | .                       | .                    | .                      | .                       | .                          | .                         | .                                                | .                                         | .                                            | .                                                      | T                     |  |
| 36                                               | 835 | P                         | .                         | .                        | .                       | .                    | .                      | .                       | .                          | .                         | .                                                | .                                         | .                                            | .                                                      | .                     |  |
| 37                                               | 836 | V                         | I                         | I                        | .                       | I                    | I                      | I                       | .                          | .                         | .                                                | .                                         | I                                            | .                                                      | I                     |  |
| 38                                               | 837 | K                         | .                         | .                        | .                       | .                    | .                      | .                       | .                          | .                         | .                                                | .                                         | .                                            | .                                                      | T                     |  |
| 39                                               | 838 | S                         | .                         | .                        | .                       | .                    | .                      | .                       | .                          | .                         | .                                                | .                                         | .                                            | .                                                      | A                     |  |
| 40                                               | 839 | S                         | .                         | .                        | .                       | .                    | .                      | .                       | .                          | .                         | .                                                | .                                         | .                                            | .                                                      | N                     |  |
| 41                                               | 840 | F                         | .                         | .                        | .                       | .                    | .                      | .                       | .                          | .                         | .                                                | .                                         | .                                            | .                                                      | .                     |  |
| 42                                               | 841 | R                         | .                         | .                        | .                       | .                    | .                      | .                       | .                          | .                         | .                                                | .                                         | .                                            | .                                                      | .                     |  |
| 43                                               | 842 | E                         | .                         | .                        | .                       | .                    | .                      | .                       | .                          | .                         | .                                                | .                                         | .                                            | .                                                      | .                     |  |
| 44                                               | 843 | G                         | .                         | .                        | .                       | .                    | .                      | .                       | .                          | .                         | .                                                | .                                         | .                                            | .                                                      | .                     |  |
| 45                                               | 844 | L                         | .                         | .                        | .                       | .                    | .                      | .                       | .                          | .                         | .                                                | .                                         | .                                            | .                                                      | .                     |  |
| 46                                               | 845 | T                         | .                         | .                        | .                       | .                    | .                      | .                       | .                          | .                         | .                                                | .                                         | .                                            | .                                                      | N                     |  |
| 47                                               | 846 | V                         | .                         | .                        | .                       | .                    | .                      | .                       | .                          | .                         | .                                                | .                                         | .                                            | .                                                      | .                     |  |
| 48                                               | 847 | L                         | .                         | .                        | .                       | .                    | .                      | .                       | .                          | .                         | .                                                | .                                         | .                                            | .                                                      | .                     |  |
| 49                                               | 848 | E                         | .                         | .                        | .                       | .                    | .                      | .                       | .                          | .                         | .                                                | .                                         | .                                            | .                                                      | Q                     |  |
| 50                                               | 849 | Y                         | .                         | .                        | .                       | .                    | .                      | .                       | .                          | .                         | .                                                | .                                         | .                                            | .                                                      | .                     |  |
| 51                                               | 850 | F                         | .                         | .                        | .                       | .                    | .                      | .                       | .                          | .                         | .                                                | .                                         | .                                            | .                                                      | .                     |  |
| 52                                               | 851 | I                         | .                         | .                        | .                       | .                    | .                      | .                       | .                          | .                         | .                                                | .                                         | .                                            | .                                                      | .                     |  |
| 53                                               | 852 | N                         | .                         | .                        | .                       | .                    | .                      | .                       | .                          | .                         | .                                                | .                                         | .                                            | .                                                      | S                     |  |
| 54                                               | 853 | T                         | .                         | .                        | .                       | .                    | .                      | .                       | .                          | .                         | .                                                | .                                         | .                                            | .                                                      | .                     |  |
| 55                                               | 854 | H                         | .                         | .                        | .                       | .                    | .                      | .                       | .                          | .                         | .                                                | .                                         | .                                            | .                                                      | .                     |  |
| 56                                               | 855 | G                         | .                         | .                        | .                       | .                    | .                      | .                       | .                          | .                         | .                                                | .                                         | .                                            | .                                                      | .                     |  |
| 57                                               | 856 | A                         | .                         | .                        | .                       | .                    | .                      | .                       | .                          | .                         | .                                                | .                                         | .                                            | .                                                      | .                     |  |
| 58                                               | 857 | R                         | .                         | .                        | .                       | .                    | .                      | .                       | .                          | .                         | .                                                | .                                         | .                                            | .                                                      | .                     |  |
| 59                                               | 858 | K                         | .                         | .                        | .                       | .                    | .                      | .                       | .                          | .                         | .                                                | .                                         | .                                            | .                                                      | .                     |  |
| 60                                               | 859 | G                         | .                         | .                        | .                       | .                    | .                      | .                       | .                          | .                         | .                                                | .                                         | .                                            | .                                                      | .                     |  |
| 61                                               | 860 | L                         | .                         | .                        | .                       | .                    | .                      | .                       | .                          | .                         | .                                                | .                                         | .                                            | .                                                      | .                     |  |
| 62                                               | 861 | A                         | .                         | .                        | .                       | .                    | .                      | .                       | .                          | .                         | .                                                | .                                         | .                                            | .                                                      | .                     |  |
| 63                                               | 862 | D                         | .                         | .                        | .                       | .                    | .                      | .                       | .                          | .                         | .                                                | .                                         | .                                            | .                                                      | .                     |  |
| 64                                               | 863 | T                         | .                         | .                        | .                       | .                    | .                      | .                       | .                          | .                         | .                                                | .                                         | .                                            | .                                                      | .                     |  |
| 65                                               | 864 | A                         | .                         | .                        | .                       | .                    | .                      | .                       | .                          | .                         | .                                                | .                                         | .                                            | .                                                      | .                     |  |
| 66                                               | 865 | L                         | .                         | .                        | .                       | .                    | .                      | .                       | .                          | .                         | .                                                | .                                         | .                                            | .                                                      | .                     |  |
| 67                                               | 866 | R                         | .                         | .                        | .                       | .                    | .                      | .                       | .                          | .                         | .                                                | .                                         | .                                            | .                                                      | K                     |  |
| 68                                               | 867 | T                         | .                         | .                        | .                       | .                    | .                      | .                       | .                          | .                         | .                                                | .                                         | .                                            | .                                                      | .                     |  |
| 69                                               | 868 | A                         | .                         | .                        | .                       | .                    | .                      | .                       | .                          | .                         | .                                                | .                                         | .                                            | .                                                      | .                     |  |
| 70                                               | 869 | D                         | .                         | .                        | .                       | .                    | .                      | .                       | .                          | .                         | .                                                | .                                         | .                                            | .                                                      | N                     |  |
| 71                                               | 870 | S                         | .                         | .                        | .                       | .                    | .                      | .                       | .                          | .                         | .                                                | .                                         | .                                            | .                                                      | .                     |  |
| 72                                               | 871 | G                         | .                         | .                        | .                       | .                    | .                      | .                       | .                          | .                         | .                                                | .                                         | .                                            | .                                                      | .                     |  |
| 73                                               | 872 | Y                         | .                         | .                        | .                       | .                    | .                      | .                       | .                          | .                         | .                                                | .                                         | .                                            | .                                                      | .                     |  |
| 74                                               | 873 | L                         | .                         | .                        | .                       | .                    | .                      | .                       | .                          | .                         | .                                                | .                                         | .                                            | .                                                      | .                     |  |
| 75                                               | 874 | T                         | .                         | .                        | .                       | .                    | .                      | .                       | .                          | .                         | .                                                | .                                         | .                                            | .                                                      | .                     |  |
| 76                                               | 875 | R                         | .                         | .                        | .                       | .                    | .                      | .                       | .                          | .                         | .                                                | .                                         | .                                            | .                                                      | .                     |  |
| 77                                               | 876 | R                         | .                         | .                        | .                       | .                    | .                      | .                       | .                          | .                         | .                                                | .                                         | .                                            | .                                                      | .                     |  |
| 78                                               | 877 | L                         | .                         | .                        | .                       | .                    | .                      | .                       | .                          | .                         | .                                                | .                                         | .                                            | .                                                      | .                     |  |
| 79                                               | 878 | V                         | .                         | .                        | .                       | .                    | .                      | .                       | .                          | .                         | .                                                | .                                         | .                                            | .                                                      | .                     |  |
| 80                                               | 879 | D                         | .                         | .                        | .                       | .                    | .                      | .                       | .                          | .                         | .                                                | .                                         | .                                            | .                                                      | .                     |  |
| 81                                               | 880 | V                         | .                         | .                        | .                       | .                    | .                      | .                       | .                          | .                         | .                                                | .                                         | .                                            | .                                                      | .                     |  |
| Direct drug target contacts                      |     |                           |                           |                          |                         |                      |                        |                         |                            |                           |                                                  |                                           |                                              |                                                        |                       |  |
| Reported resistance after mutation               |     |                           |                           |                          |                         |                      |                        |                         |                            |                           |                                                  |                                           |                                              |                                                        |                       |  |
| 7 Å distance from target bound D-AAP1            |     |                           |                           |                          |                         |                      |                        |                         |                            |                           |                                                  |                                           |                                              |                                                        |                       |  |
